1 **Novel strains of *Campylobacter* cause diarrheal outbreak in Rhesus**  
2 **macaques (*Macaca mulatta*) of Kathmandu Valley**

3

4 Rajindra Napit<sup>1,2\*</sup>, Prajwol Manandhar<sup>1,2</sup>, Ajit Poudel<sup>1,2</sup>, Pragun G. Rajbhandari<sup>1†</sup>, Sarah Watson<sup>3</sup>, Sapana  
5 Shakya<sup>1</sup>, Saman M. Pradhan<sup>1,2</sup>, Ajay N. Sharma<sup>1</sup>, Ashok Chaudhary<sup>1</sup>, Christine K. Johnson<sup>4</sup>, Jonna K.  
6 Mazet<sup>4</sup>, Dibesh Karmacharya<sup>1,2,5\*</sup>

7 **†These authors contributed equally to this work.**

8 <sup>1</sup>One Health Research Division, Center for Molecular Dynamics Nepal, Thapathali-11, Kathmandu 44600,  
9 Nepal

10 <sup>2</sup> Research Division, BIOVAC Nepal Pvt. Ltd., Nala, Banepa, Nepal

11 <sup>3</sup> London School of Hygiene and Tropical Medicine, London, UK

12 <sup>4</sup>One Health Institute, School of Veterinary Medicine, University of California, Davis, USA

13 <sup>5</sup>The School of Biological Sciences, University of Queensland, Australia

14 \*corresponding [dibesh@cmdn.org](mailto:dibesh@cmdn.org), [dibesh@biovacnepal.com](mailto:dibesh@biovacnepal.com), [rajindra04@gmail.com](mailto:rajindra04@gmail.com)

15

16

17

## 18 **Abstract**

19 *Campylobacter spp.* is often underreported and underrated bacteria that present real health risks to both  
20 humans and animals, including non-human primates. It is a commensal microorganism of gastrointestinal  
21 tract known to cause gastroenteritis in humans. Commonly found in many wild animals including non-  
22 human primates (monkeys- Rhesus macaques) these pathogens are known to be a common cause of diarrhea  
23 in humans in many parts of developing and under developed countries.

24 Rhesus macaques from the two holy sites in Kathmandu (Pashupati and Swoyambhu) were included in this  
25 cross-sectional study. Opportunistic diarrheal samples of monkeys were analyzed to detect and characterize  
26 the pathogen using 16S rRNA-based PCR screening, followed by DNA sequencing and phylogenetic  
27 analysis.

28 Out of a total 67 collected diarrheal samples, *Campylobacter spp.* were detected in the majority of the  
29 samples (n=64; 96%). DNA sequences of the amplified PCR products were successfully obtained from 13  
30 samples. Phylogenetic analysis identified *Candidatus Campylobacter infans* (n=10, Kimura-2 parameter  
31 (K2P) pairwise distance values of 0.002287). Remaining three sequences might potentially belong to a  
32 novel *Campylobacter* species/sub-species- closely relating to known species of *C. helviticus* (K2P pairwise  
33 distance of 0.0267). Both *Candidatus Campylobacter infans* and *C. helviticus* are known to infect humans  
34 and animals. Additionally, we also detected the bacteria in water and soil samples from the sites.  
35 *Campylobacter spp.* caused the 2018 diarrhea outbreak in Rhesus macaques in the Kathmandu valley.  
36 *Campylobacter* might be one of the important contributing pathogens in diarrheal outbreaks-both in humans  
37 and animals (monkeys) in Nepal. Due to close interactions of these animals with humans and other animals,  
38 One Health approach might be the most effective way to prevent and mitigate the threat posed by this  
39 pathogen.

40

## 42 **Introduction**

43 *Campylobacter spp.* is a zoonotic pathogen that is found in the gut flora of many species ranging from  
44 domesticated to wild animals- both free roaming and in captivity. It is capable of infecting humans as well  
45 as non-human primates (NHP) causing mild to severe gastrointestinal problems [1–3]. Emergence of  
46 antibiotic-resistant strains of *Campylobacter* is a major public health concern as animals carrying the  
47 bacteria pose a significant risk to humans via contamination of water sources, food, or through repeated  
48 interactions (physical contacts) [2–4]. In Nepal, *Campylobacter* is one of the leading causes of food-borne  
49 infections; and antibiotic resistant strains of the bacteria have also been reported in poultry slaughter houses  
50 throughout Nepal [5–8]. Most of the studies conducted in the country have mostly been limited to food-  
51 borne pathogenesis of *Campylobacter* [5–9]. Although, zoonotic spillover is highly prevalent from  
52 interactions with animals either carrying or infected with *Campylobacter*, very limited studies have been  
53 conducted in Nepal [6]. Limited publications are available documenting spillover from domesticated dogs  
54 *Canis lupus familiaris* [10] and from livestock to farmers [11]. However, no such studies have been  
55 published highlighting detection and possible spillover of *Campylobacter* from NHP such as Rhesus  
56 macaques (*Macaca mullata*, commonly known as monkeys) to humans in Nepal, even though, risk of such  
57 exposure and disease transmission have been widely documented [2–4].

58 *Campylobacter spp.* have been found in both captive and free-roaming monkeys causing diarrhea and  
59 severe enterocolitis [2,12,13]. Due to NHP's high genomic similarities and close evolutionary relationships  
60 to humans, and similar gut flora detected in developing countries, the risk of zoonotic transfer of pathogenic  
61 strains of bacteria like *Campylobacter* is highly probable [14,15]. Previous studies have detected presence  
62 of the bacteria in captive NHPs in the United States [16], New Zealand [17], and in Kenya [13]. Presence  
63 of pathogenic strains of the bacteria in healthy and asymptomatic monkeys[1] poses even higher risk of  
64 zoonotic spillover through direct physical contact or indirectly as a potential source of environmental  
65 contamination by fecal matter [18].

66 In Kathmandu, monkeys inhabit few of the major holy sites including Pashupati and Swoyambhu. These  
67 sites, are surrounded by dense urban human population and have significant human-wildlife (monkey)  
68 interactions. Following report of diarrhea outbreak (2018) in monkeys of these two sites, we carried out an  
69 opportunistic cross-sectional research- specifically designed to detect and characterize *Campylobacter*  
70 infections.

## 71 **Materials and Methods**

### 72 **Ethical Statement**

73 The research was conducted as a supplementary study to the PREDICT project which focused on  
74 understanding emerging diseases in urban-wildlife interfaces. All the permits and ethical clearance were  
75 obtained before the study. The non-invasive sampling and analysis were covered by the permit obtained  
76 from the Nepal Health Research Council (NHRC, Ref.no. 224).

### 77 **Study Design and Site Selection**

78 A cross-sectional study was conducted during active diarrheal outbreaks at two Rhesus macaque inhabiting  
79 sites (Pashupati and Swoyambhu) in Kathmandu (Nepal) in 2018 (June -July) [19]. The sampling sites were  
80 chosen according to the confined habitat, with a focus on areas with frequent monkey-human interactions.  
81 These two holy (temple) sites of in the Kathmandu have many free-roaming monkeys and are frequently  
82 visited by people for sightseeing and religious purposes. Cattle, dogs, chickens and other birds are also  
83 present in abundance in neighboring areas of the temples.

84 Swoyambhunath temple, one of the oldest Buddhist holy sites in the region, is situated on top of a hillock  
85 in the northwest of the Kathmandu Valley. Also known as the “Monkey Temple”, the area surrounding  
86 Swoyambhunath (with area of 2.5 square kilometer) is home to one of the largest populations of free-  
87 roaming macaques in the region. The site hosts an estimated population of 400 monkeys [20]. Pashupatinath

88 temple is one of the most important and popular holy Hindu sites in Nepal. This site is home to a population  
89 of 300 monkeys [20,21], which reside in nearby patches of forests (Bankali, Bhandarkhal and Mrigasthali)  
90 surrounding the temple premises [22].

91

92 Figure 1: Rhesus macaque diarrheal outbreak sites (A. Swoyambhu B. Pashupatinath) located within  
93 Kathmandu Metropolitan city, Nepal (Image was created using QGIS).

94

95 Both sites were divided into 5 transects, and 5 field teams were mobilized to systematically comb through  
96 each transect and collect only diarrheal (loose) fecal samples from monkeys. Feces were collected using  
97 sterile swabs in a tube containing phosphate-buffered saline (PBS). A portion of the feces were also  
98 collected in silica gel tubes as replicate. Additionally, adjacent soil and water samples from a drinking water  
99 source (pond) were also collected to check for any possible environmental contamination. The samples  
100 were immediately transported in cold-chain to our lab in Kathmandu and stored at -20°C freezer for further  
101 processing. A total of 67 opportunistic diarrheal fecal samples and surrounding soil samples (n=11) were  
102 collected from both the sites. Some water samples (n=5, river and drinking water sources) were also  
103 collected.

104

105 **Campylobacter detection and characterization**

106 **Molecular screening and 16S rRNA gene sequencing**

107 Bacterial DNA was extracted from collected samples using Bacterial DNA extraction kit (Zymo Research,  
108 USA) according to the manufacturer's instructions, and were stored at -20°C. Screening for *Campylobacter*  
109 was carried out by targeting the ~ 800 bp fragment of the 16S rRNA gene using *Campylobacter* genus  
110 specific PCR primer sets C412F and C1288R [23]. PCR amplification was done in 25µl volume containing  
111 reaction buffer, 0.2nmol primers, Taq polymerase and 2ul template. The cycling condition for the PCR-  
112 initial denaturation at 95°C for 4 minutes, 35 cycles of denaturation at 95°C for 30 sec, annealing at 55°C  
113 for 30 sec and extension at 72°C for 30 sec, final extension 72°C for 10 min and hold at 4°C. The PCR  
114 products were separated on 1.5% agarose gel electrophoresis.

115 8µl amplified PCR product was cleaned using 2µl of ExoSAP-IT™ kit (Thermofisher, Catalog No.  
116 78200.200.UL). The reaction mixture was then incubated for 30 minutes at 55°C to get rid of excess  
117 primers, followed by 85°C for 10 minutes for reaction deactivation. The purified PCR products were then  
118 sequenced on an ABI thermocycler using BigDye™ Terminator V3.1 Cycle Sequencing Kit (Catalog No.  
119 4337455). Excess salts and dye terminators were removed using BigDye® XTerminator™ Purification Kit  
120 (Catalog No.4376486). The samples were then analyzed on ABI 310 Genetic Analyzer.

121

## 122 **Phylogenetic Analysis**

123 The phylogenetic analysis was performed using BEAST v2.6.4 of partial 16S rRNA sequence [24]. A  
124 ~649bp (final size after quality trim) sequences from the NCBI Genbank database was obtained of all  
125 known *Campylobacter* species [25]. Along with the sequences obtained from the NCBI database, 13  
126 sequences (Genbank acc: MZ06810 to MZ068112) obtained from this study was also included to form a  
127 dataset of 16S rRNA partial sequences (supplementary table 2). All the sequences were aligned using  
128 MUSCLE v3.8.425 [26] and was visualized in AliView v1.27 [27]. Model test for BEAST analysis was  
129 performed using Bmodel test v1.2.1 [28] for substitution model for 10 million iterations. The phylogenetic  
130 tree was prepared on BEAST v2.6.4 with HKY substitution model and YuleModel with 100 million  
131 iterations, every 1000 trees subsampling and discarding 25% of samples as burn-in. The log file from  
132 BEAST was analyzed using Tracer v1.7.2 [29] to verify all the parameter has effective sampling size (ESS)  
133 above 200 and tree was visualized/edited using Figtree v 1.4.4 [30]. Further, the mean genetic distance  
134 between our 13 unknown *Campylobacter spp.* samples and other *Campylobacter spp.* found in the  
135 neighboring clades from the phylogenetic analysis, were estimated through the Kimura 2-parameter (K2P)  
136 distance measure using MEGA 11 v11.0.10 [31].

## 137 **Results**

138 Out of 67 fecal samples, 64 (95.5%) had detectable *Campylobacter*. Some soil (n=1) and water (n=1)  
139 samples were also contaminated with the bacteria (Table 1).

140

141 Table 1: *Campylobacter* in fecal samples of rhesus macaque, soil and water from two sites in Kathmandu.

|                      | <b>Total number of sample</b> | <b>Number (%) <i>Campylobacter spp.</i> present</b> |
|----------------------|-------------------------------|-----------------------------------------------------|
| Rhesus Macaque Fecal | 67                            | 64 (95.5%)                                          |
| Water                | 5                             | 1 (20%)                                             |
| Soil                 | 11                            | 1 (0.9%)                                            |

146

147

148 *Figure 2: Detection of Campylobacter sp. in rhesus macaque fecal samples using PCR.*

149

## 150 **Sequencing and Phylogenetic Analysis**

151 Out of the 64 samples, only 13 provided acceptable quality of 16S DNA sequences, which was used to  
152 conduct phylogenetic analysis to resolve taxonomy of the *Campylobacter* isolates.

153 The topology of the phylogenetic tree constructed showed that different species of *Campylobacter spp.*  
154 clustering together in distinct clades. The isolates having same host species grouped together in a same  
155 clade with some exceptions. Our isolates clustered into distinct two clades identified- Clade-1 and Clade-2  
156 (Figure 3). The clade-2 samples (PE005, PB002 and SA003) clustered together with *C. upsaliensis*, *C.*  
157 *vulpis*, *C. helveticus*, *C. troglodytes*. Whereas clade-1 (SA002, SA004 – SA009, SA011, SB008 & PD003)  
158 samples clustered together in a monophyletic clade comprising of a recently discovered species- *Candidatus*  
159 *Campylobacter infans*.

160 The Kimura 2-paramater (K2P) pairwise distance between clade-1 isolates and the recently discovered  
161 species of *Candidatus Campylobacter infans* (Genbank acc: CP049075) was 0.002287 after averaging the



162 pairwise distances (supplementary figure 2). Similarly, the average K2P pairwise distance between clade-  
163 1 isolates with an isolate of *C. hyointestinalis subsp. lawsonii* (Genbank acc: HQ628645) found in the  
164 neighboring clade to the isolates, was calculated to be 0.0206. The average K2P pairwise distance of the  
165 clade-2 isolates was compared with a representative isolate of monophyletic clades of *C. upsaliensis*  
166 (Genbank acc: AF550642), *C. troglodytes* (Genbank acc: EU559331) and *C. helveticus* (Genbank acc:  
167 DQ174161) and was calculated to be 0.033, 0.0285, and 0.0267, respectively (supplementary figure 3).

168

169 **Figure 3: Phylogenetic tree of *Campylobacter spp.*** showing all the detected and reference sequences  
170 [constructed using Bayesian inference (BEAST v 2.6.4) and visualized/edited using Figtree v 1.4.4]. A)  
171 Cladogram of *Campylobacter spp.* B) Phylogenetic tree constructed using detected and reference  
172 *Campylobacter spp.*

173

174

## 175 **Discussion**

176 Zoonotic pathogens are one of the most common sources of emerging diseases [32]. *Campylobacter* is  
177 considered to be one of the most prevalent zoonotic pathogens [33] that might be contributing to a broader  
178 antimicrobial resistance, especially in low and middle-income countries [34,35]. Nepal has very high  
179 burden of *Campylobacter* infections [5,36,37] and it is implicated for causing diarrhea in some of the  
180 international travelers; it is also known to cause acute gastroenteritis in children in Nepal [38–40]. Rhesus  
181 macaques (monkeys) have close-interactions with humans and other domestic animals, including dogs, in  
182 some areas of densely populated Kathmandu. The risk of zoonosis and reverse zoonosis of disease between  
183 monkeys and humans are high [33] .

184 The detection and diagnosis of *Campylobacter* infection has been challenging due to inefficiency in widely  
185 used culture-based detection[41]. However, availability of molecular based diagnostic techniques have  
186 proved effective in detecting bacterial species that are normally difficult to culture [42,43]. This might be  
187 the first study in Nepal where *Campylobacter* is directly detected in macaque feces. The *Campylobacter*  
188 was detected in water and soil samples as well, which could increase pathogen spillover possibility amongst  
189 various species intermingling at the sites [44].

190 The phylogenetic analysis of 16S rRNA gene sequences of *Campylobacter* showed presence of two clades  
191 of the bacteria (Fig. 3). The phylogenetic tree in our study also revealed more or less identical  
192 (Supplementary Fig. 4) structure of bacteria clades as found in the study published by Wilkinson D. A.,  
193 et.al. (2018) [45]. That study used more elaborate whole genome sequence data, and the fact that our study  
194 also produced similar *Campylobacter* clade structure using only 16S rRNA fragment sequence data,  
195 validates the utility and accuracy of our technique.

196 The clade-1 isolates clustered together with the newly reported species of *Campylobacter* (*Candidatus C.*  
197 *infans*), though neighboring clades consisted of other species as well (Fig. 3). However, these isolates of  
198 other species in clade-1 could have been misidentified by the authors, as the K2P distances of isolates found

199 in clade-1 have close distances to *Candidatus C. infans*, (Supplementary Figure 2) inferring that all isolates  
200 in clade-1 could possibly be identified as this newly discovered species. Previous cases of *Candidatus C.*  
201 *infans* have been isolated from infants from sub-Saharan Africa and South Asia, and from a male (human)  
202 in the Netherlands [46]. The *Campylobacter spp.* isolated in this study all originated from monkey fecal  
203 samples, which raises a serious concern over zoonotic capability of these particular isolates [47,48].  
204 Furthermore, an isolate from India found in clade-1 was isolated from sheep alluding to strong evidence to  
205 support zoonotic plasticity.

206 Clade-2 contained the three remaining sequences from this study. The clustering of *C. helveticus*, *C.*  
207 *upsaliensis* and *C. troglodytes* in a nearby clades could also be observed as sister clades to clade-2 isolates.  
208 Our three isolates formed separate monophyletic clades (Fig. 3) within clade-2 indicating the findings of a  
209 probable new species or sub-species of the *Campylobacter*, which was further supported by the K2P  
210 pairwise distance with the closest distance of 0.0267 being with *C. helveticus*, which is similar to the values  
211 of clade-1 isolates against *C. hyointestinalis subsp. lawsonii* (HQ628645). However, further investigation  
212 with a longer 16S rRNA gene fragment or whole genome sequences may be required to properly verify the  
213 inferred result.

214 Samples were collected from two different sites separated by dense human settlements- almost making  
215 them wooded islands within the urban landscape. The *Campylobacter* isolates from both the sites clustered  
216 together in both clade-1 and clade-2 (Fig. 3). This result suggests there might be some complex interactions  
217 taking place between these two animal populations. Since monkeys from these two sites rarely intermingle,  
218 the disease spread might be limited as well. However, humans might help spread *Campylobacter* between  
219 these two populations of monkeys.

220 *C. hyointestinalis* is a commensal organism of pigs whereas *C. helveticus* is commensal in dogs and cats  
221 [45]. *Campylobacter* can potentially infect monkeys from these animals, and/or through humans as  
222 intermediate hosts. Considering other species such as birds, cats and dogs are also interacting closely with  
223 the monkeys at these two sites, the *Campylobacter* reservoir, spillover and transmission are truly playing

224 out in One Health dynamics. Hence, this study highlights the importance of One Health approach to  
225 understand and prevent emerging, re-emerging and prevalent infectious diseases.

226 Diarrheal diseases are one of the most devastating public health concerns in Nepal, especially in a densely  
227 populated metropolitan cities like Kathmandu. *Campylobacter* might be one of the important contributing  
228 pathogens in diarrheal outbreaks-both in humans and animals (monkeys). We hope that our study will draw  
229 attention to this problem and help public health experts in formulating a plan to cure and prevent this kind  
230 of outbreak in macaques, thereby, preventing spillover to humans.

### 231 **Data Availability**

232 DNA sequences are available in the NCBI Genbank with accession number MZ06810 to MZ068112. All  
233 the data are included in manuscript including supplementary information.

234

## 235 **Acknowledgement**

236 We would like to thank the Pashupati Area Development Trust and the Federation of Swoyambhu  
237 Management and Conservation for providing the permit and facilitating this research. We would also like  
238 to thank PREDICT Consortium for their assistance during various phases of the project. We would also  
239 like to show our gratitude to the Metropolitan City of Kathmandu for helping us with the study. Finally, we  
240 thank all the staffs of Intrepid Nepal including Biswo Parakram Shrestha, Samita Raut, Dhiraj Puri for  
241 assisting in field sampling and lab experiments during the course of this study.

242

243

## 244 **Reference**

- 245 1. Andrade MCR, Gabeira SC de O, Abreu-Lopes D, Esteves WTC, Vilardo M de CB, Thomé J, et  
246 al. Circulation of *Campylobacter* spp. in rhesus monkeys (*Macaca mulatta*) held in captivity: a  
247 longitudinal study. *Mem Inst Oswaldo Cruz*. 2007;102: 53–57.
- 248 2. Komba EV. Human and Animal Thermophilic *Campylobacter* infections in East African  
249 countries: *Epidemiology and Antibiogram*. *Biomed J Sci Tech Res*. 2017;1.  
250 doi:10.26717/BJSTR.2017.01.000411
- 251 3. Weis AM, Storey DB, Taff CC, Townsend AK, Huang BC, Kong NT, et al. Genomic comparison  
252 of *Campylobacter* spp. and their potential for zoonotic transmission between birds, primates, and  
253 livestock. *Appl Environ Microbiol*. 2016;82: 7165–7175.
- 254 4. Devaux CA, Mediannikov O, Medkour H, Raoult D. Infectious disease risk across the growing  
255 human-non human primate interface: A review of the evidence. *Front Public Heal*. 2019; 305.
- 256 5. Acharya KP, Wilson RT. Antimicrobial resistance in Nepal. *Front Med*. 2019;6: 105.
- 257 6. Bhattarai D, Bhattarai N, Osti R. Prevalence of Thermophilic *Campylobacter* Isolated from Water  
258 Used in Slaughter House of Kathmandu and Ruphendehi District, Nepal. *Int J Appl Sci*  
259 *Biotechnol*. 2019;7: 75–80.
- 260 7. Gautam A, Neupane S, Kaphle K. *Campylobacter* Infection and its Sensitivity in Retail Pork. *Int J*  
261 *Appl Sci Biotechnol*. 2020;8: 132–139.

- 262 8. Neupane R, Kaphle K. Bacteriological quality of poultry meat in Nepal. *Int J Vet Sci.* 2019.
- 263 9. Abebe E, Gugsu G, Ahmed M. Review on major food-borne zoonotic bacterial pathogens. *J Trop*  
264 *Med.* 2020;2020.
- 265 10. Pathak A, Kaphle K. Dog: A Friendly Pathway to Zoonoses. *Nepal Vet J.* 2019;36: 170–177.
- 266 11. Adhikari R, Bagale KB. Risk of Zoonoses among livestock farmers in Nepal. *J Heal Promot.*  
267 2019;7: 99–110.
- 268 12. Misawa N, Shinohara S, Satoh H, Itoh H, Shinohara K, Shimomura K, et al. Isolation of  
269 *Campylobacter* species from zoo animals and polymerase chain reaction-based random amplified  
270 polymorphism DNA analysis. *Vet Microbiol.* 2000;71: 59–68. doi:10.1016/S0378-  
271 1135(99)00156-X
- 272 13. Ngotho M, Ngure RM, Kamau DM, Kagira JM, Gichuki C, Farah IO, et al. A fatal outbreak of  
273 *Campylobacter jejuni* enteritis in a colony of vervet monkeys in Kenya. 2017.
- 274 14. Keita MB, Hamad I, Bittar F. Looking in apes as a source of human pathogens. *Microb Pathog.*  
275 2014;77: 149–154. doi:10.1016/J.MICPATH.2014.09.003
- 276 15. Rhoades N, Barr T, Hendrickson S, Prongay K, Haertel A, Gill L, et al. Maturation of the infant  
277 rhesus macaque gut microbiome and its role in the development of diarrheal disease. *Genome*  
278 *Biol.* 2019;20: 1–16.
- 279 16. Clayton JB, Danzeisen JL, Johnson TJ, Trent AM, Hayer SS, Murphy T, et al. Characterization of  
280 *Campylobacter jejuni*, *Campylobacter upsaliensis*, and a novel *Campylobacter* sp. in a captive  
281 non-human primate zoological collection. *J Med Primatol.* 2018/12/12. 2019;48: 114–122.  
282 doi:10.1111/jmp.12393
- 283 17. Sowerby N. Identification and genotyping of *Campylobacter* spp. strains isolated from a captive  
284 wildlife population in New Zealand. Auckland University of Technology. 2015.
- 285 18. Tegner C, Sunil-Chandra NP, Wijesooriya W, Perera BV, Hansson I, Fahlman Å. Detection,  
286 Identification, and Antimicrobial Susceptibility of *Campylobacter* spp. and *Salmonella* spp. from  
287 Free-ranging Nonhuman Primates in Sri Lanka. *J Wildl Dis.* 2019;55: 879–884.
- 288 19. Adams N, Dhimal M, Mathews S, Iyer V, Murtugudde R, Liang X-Z, et al. El Niño Southern  
289 Oscillation, monsoon anomaly, and childhood diarrheal disease morbidity in Nepal. *PNAS Nexus.*  
290 2022;1: pgac032.
- 291 20. Chalise MK. Primate Census in Kathmandu and West Parts of Nepal. *J Nat Hist Mus.* 2008;23:  
292 60–64. doi:10.3126/JNHM.V23I0.1840
- 293 21. Chalise MK. Fragmented Primate Population of Nepal. *Primates Fragm Complex Resil.* 2013;  
294 329–356. doi:10.1007/978-1-4614-8839-2\_22
- 295 22. Baral K. Conservation and threat to selected monkey species in Nepal compared to selected  
296 species in Tanzania. Norwegian University of Life Sciences. 2014.

- 297 23. Linton D, Owen RJ, Stanley J. Rapid identification by PCR of the genus *Campylobacter* and of  
298 five *Campylobacter* species enteropathogenic for man and animals. *Res Microbiol.* 1996;147:  
299 707–718. doi:10.1016/S0923-2508(97)85118-2
- 300 24. Bouckaert R, Vaughan TG, Barido-Sottani J, Duchêne S, Fourment M, Gavryushkina A, et al.  
301 BEAST 2.5: An advanced software platform for Bayesian evolutionary analysis. *PLoS Comput*  
302 *Biol.* 2019;15: e1006650. doi:10.1371/journal.pcbi.1006650
- 303 25. Gorkiewicz G, Feierl G, Zechner R, Zechner EL. Transmission of *Campylobacter hyointestinalis*  
304 from a pig to a human. *J Clin Microbiol.* 2002;40: 2601–2605. doi:10.1128/JCM.40.7.2601-  
305 2605.2002/ASSET/A946BEDE-3BB4-4777-A449-  
306 8F5DCD18D429/ASSETS/GRAPHIC/JM0721442001.JPEG
- 307 26. Edgar RC. MUSCLE: multiple sequence alignment with high accuracy and high throughput.  
308 *Nucleic Acids Res.* 2004;32: 1792–1797. doi:10.1093/NAR/GKH340
- 309 27. Larsson A. AliView: a fast and lightweight alignment viewer and editor for large datasets.  
310 *Bioinformatics.* 2014;30: 3276–3278. doi:10.1093/bioinformatics/btu531
- 311 28. Bouckaert RR, Drummond AJ. bModelTest: Bayesian phylogenetic site model averaging and  
312 model comparison. *BMC Evol Biol.* 2017;17: 1–11. doi:10.1186/S12862-017-0890-6/FIGURES/6
- 313 29. Rambaut A, Drummond AJ, Xie D, Baele G, Suchard MA. Posterior Summarization in Bayesian  
314 Phylogenetics Using Tracer 1.7. *Syst Biol.* 2018;67: 901–904. doi:10.1093/SYSBIO/SYY032
- 315 30. Rambaut A. Figtree v1.4.4.
- 316 31. Tamura K, Stecher G, Kumar S. MEGA11: Molecular Evolutionary Genetics Analysis Version 11.  
317 *Mol Biol Evol.* 2021;38: 3022–3027. doi:10.1093/MOLBEV/MSAB120
- 318 32. Magouras I, Brookes VJ, Jori F, Martin A, Pfeiffer DU, Dürr S. Emerging zoonotic diseases:  
319 Should we rethink the animal–human interface? *Front Vet Sci.* 2020; 748.
- 320 33. Masila NM, Ross KE, Gardner MG, Whiley H. Zoonotic and Public Health Implications of  
321 *Campylobacter* Species and Squamates (Lizards, Snakes and Amphisbaenians). *Pathogens.*  
322 2020;9: 799.
- 323 34. Hlashwayo DF, Sigauque B, Bila CG. Epidemiology and antimicrobial resistance of  
324 *Campylobacter* spp. in animals in Sub-Saharan Africa: A systematic review. *Heliyon.* 2020;6:  
325 e03537.
- 326 35. Kaakoush NO, Castaño-Rodríguez N, Mitchell HM, Man SM. Global epidemiology of  
327 *Campylobacter* infection. *Clin Microbiol Rev.* 2015;28: 687–720.
- 328 36. Ghimire L, Singh DK, Basnet HB, Bhattarai RK, Dhakal S, Sharma B. Prevalence, antibiogram  
329 and risk factors of thermophilic *campylobacter* spp. in dressed porcine carcass of Chitwan, Nepal.  
330 *BMC Microbiol.* 2014;14: 85. doi:10.1186/1471-2180-14-85
- 331 37. Gautam A, Neupane S, Kaphle K. *Campylobacter* Infection and its Sensitivity in Retail Pork. *Int J*

- 332 Appl Sci Biotechnol. 2020;8: 132–139. doi:10.3126/IJASBT.V8I2.29587
- 333 38. Bhattarai V, Sharma S, Rijal KR, Banjara MR. Co-infection with *Campylobacter* and rotavirus in  
334 less than 5 year old children with acute gastroenteritis in Nepal during 2017-2018. BMC Pediatr.  
335 2020;20: 1–8. doi:10.1186/S12887-020-1966-9/FIGURES/2
- 336 39. Murphy H, Bodhidatta L, Sornsakrin S, Khadka B, Pokhrel A, Shakya S, et al. Traveler’s diarrhea  
337 in Nepal-changes in etiology and antimicrobial resistance. J Travel Med. 2019;26.  
338 doi:10.1093/JTM/TAZ054
- 339 40. Pandey P, Bodhidatta L, Lewis M, Murphy H, Shlim DR, Cave W, et al. Travelers’ diarrhea in  
340 Nepal: an update on the pathogens and antibiotic resistance. J Travel Med. 2011;18: 102–108.  
341 doi:10.1111/J.1708-8305.2010.00475.X
- 342 41. CDC. Centers for disease control and prevention, national center for emerging and zoonotic  
343 infectious diseases (NCEZID), Division of Foodborne, Waterborne, and Environmental Diseases  
344 (DFWED). 2012.
- 345 42. do Nascimento Veras H, da Silva Quetz J, Lima IFN, Rodrigues TS, Havt A, Rey LC, et al.  
346 Combination of different methods for detection of *Campylobacter* spp. in young children with  
347 moderate to severe diarrhea. J Microbiol Methods. 2016;128: 7–9.
- 348 43. Ricke SC, Feye KM, Chaney WE, Shi Z, Pavlidis H, Yang Y. Developments in rapid detection  
349 methods for the detection of foodborne campylobacter in the United States. Front Microbiol. 2019;  
350 3280.
- 351 44. Facciola A, Riso R, Avventuroso E, Visalli G, Delia SA, Laganà P. *Campylobacter*: from  
352 microbiology to prevention. J Prev Med Hyg. 2017;58: E79. Available:  
353 /pmc/articles/PMC5584092/
- 354 45. Wilkinson DA, O’Donnell AJ, Akhter RN, Fayaz A, MacK HJ, Rogers LE, et al. Updating the  
355 genomic taxonomy and epidemiology of *Campylobacter hyointestinalis*. Sci Reports 2018 81.  
356 2018;8: 1–12. doi:10.1038/s41598-018-20889-x
- 357 46. Flipse J, Duim B, Wallinga JA, de Wijkerslooth LRH, Graaf-van Bloois L van der, Timmerman  
358 AJ, et al. A Case of Persistent Diarrhea in a Man with the Molecular Detection of Various  
359 *Campylobacter* species and the First Isolation of *candidatus Campylobacter infans*. Pathogens.  
360 2020;9: 1003.
- 361 47. Delahoy MJ, Wodnik B, McAliley L, Penakalapati G, Swarthout J, Freeman MC, et al. Pathogens  
362 transmitted in animal feces in low-and middle-income countries. Int J Hyg Environ Health.  
363 2018;221: 661–676.
- 364 48. Himsworth CG, Skinner S, Chaban B, Jenkins E, Wagner BA, Harms NJ, et al. Multiple zoonotic  
365 pathogens identified in canine feces collected from a remote Canadian indigenous community. Am  
366 J Trop Med Hyg. 2010;83: 338.
- 367 49. Ahmed W, Hodggers L, Sidhu JPS, Toze S. Fecal indicators and zoonotic pathogens in household  
368 drinking water taps fed from rainwater tanks in Southeast Queensland, Australia. Appl Environ



369 Microbiol. 2012;78: 219–226.

370 50. Ferreira V, Magalhães R, Teixeira P, Castro PML, Calheiros CSC. Occurrence of Fecal Bacteria  
371 and Zoonotic Pathogens in Different Water Bodies: Supporting Water Quality Management.  
372 Water. 2022;14: 780.

373

374

375

376

## 377 **Supplementary Information**

378 **Supplementary Figure 1:** 16S rRNA based PCR detection of *Campylobacter sp.* from 27 Rhesus  
379 macaques fecal samples

380 **Supplementary Table 1:** Location of collected diarrhea fecal samples of Rhesus macaque

381 **Supplementary Table 2:** Reference sequences 16S rRNA used in this study

382 **Supplementary Figure 2:** Kimura-2 parameter pairwise distance calculation of clade-1 isolates  
383 compared to isolates of *C. hyointestinalis subsp. lawsonii* and *Candidatus C. infans*

384 **Supplementary Figure 3:** Kimura-2 parameter pairwise distance calculation of clade-2 with isolates of  
385 *C. vulpis*, *C. upsaliensis*, *C. troglodytes* & *C. helveticus*

386 **Supplementary Figure 4:** Comparison of core genome alignment network for non-thermophilic  
387 *Campylobacter* species (right) from D. A. Wilkinson, et.al., (2018) and partial 16srRNA gene  
388 sequences obtained in this study. Phylogenetics prepared by using BEAST v 2.6.4 (left). Arrow  
389 indicates clade from same species (for ease of comparison).

# Kathmandu district showing two study sites of Macaque sample collection

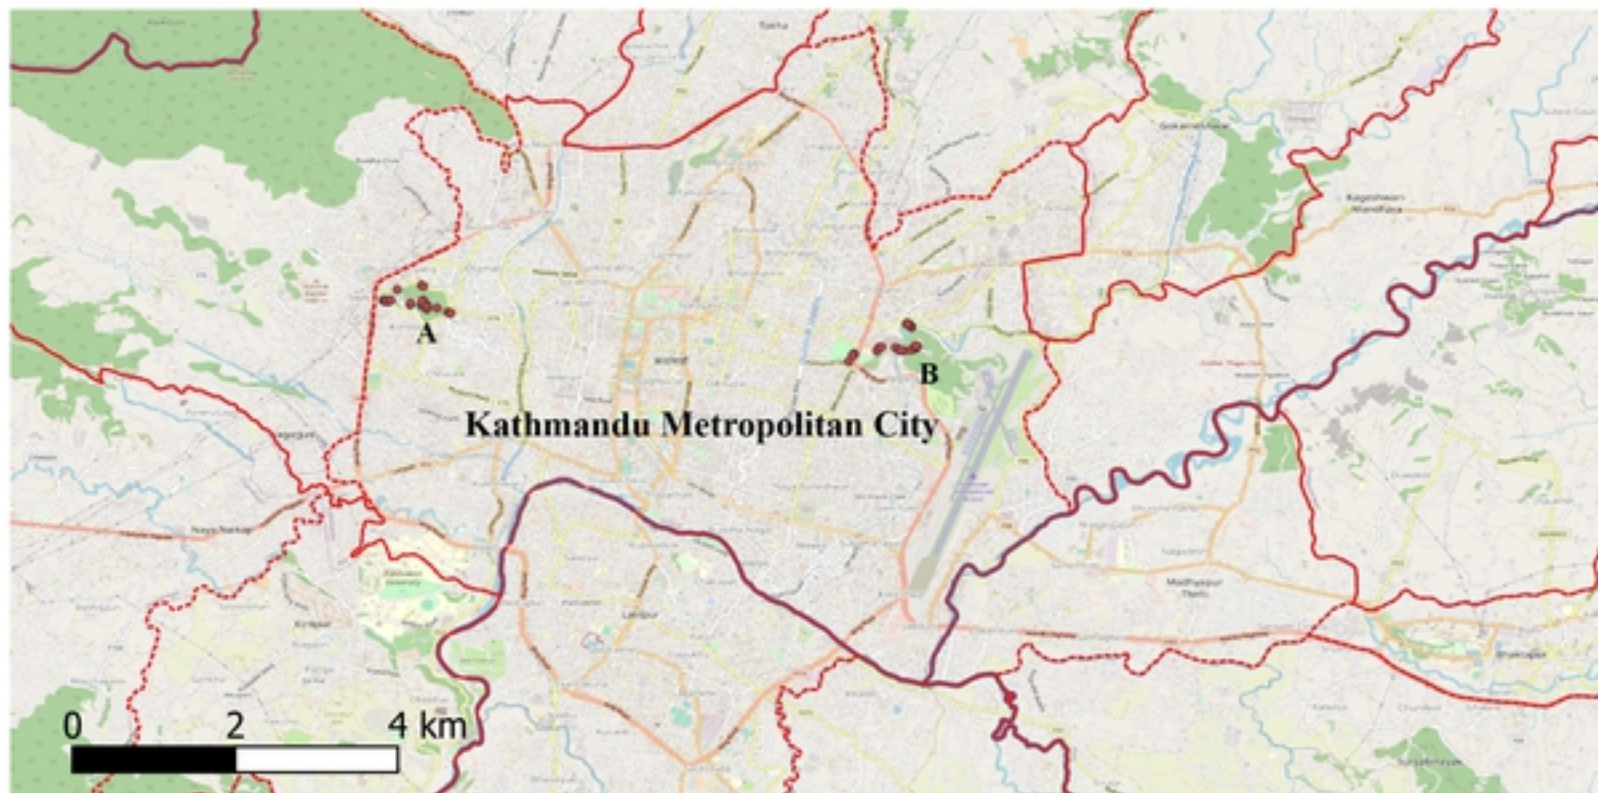

## Legend

-  District boundary
-  Municipality/Metropolitan boundary
-  Macaque samples

Map Source: OpenStreetMap Standard

## A. Swoyambhu

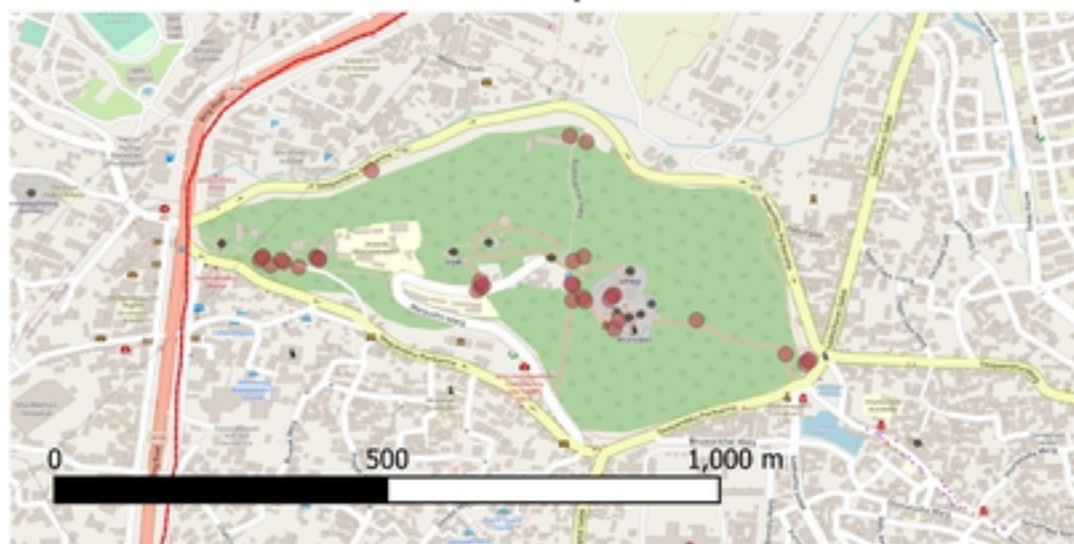

## B. Pashupatinath

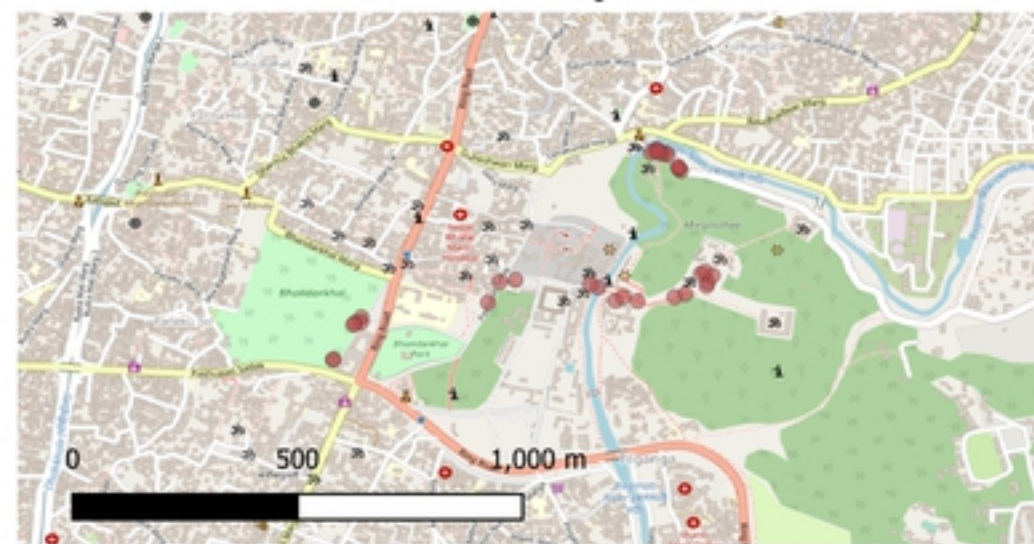

Figure 1

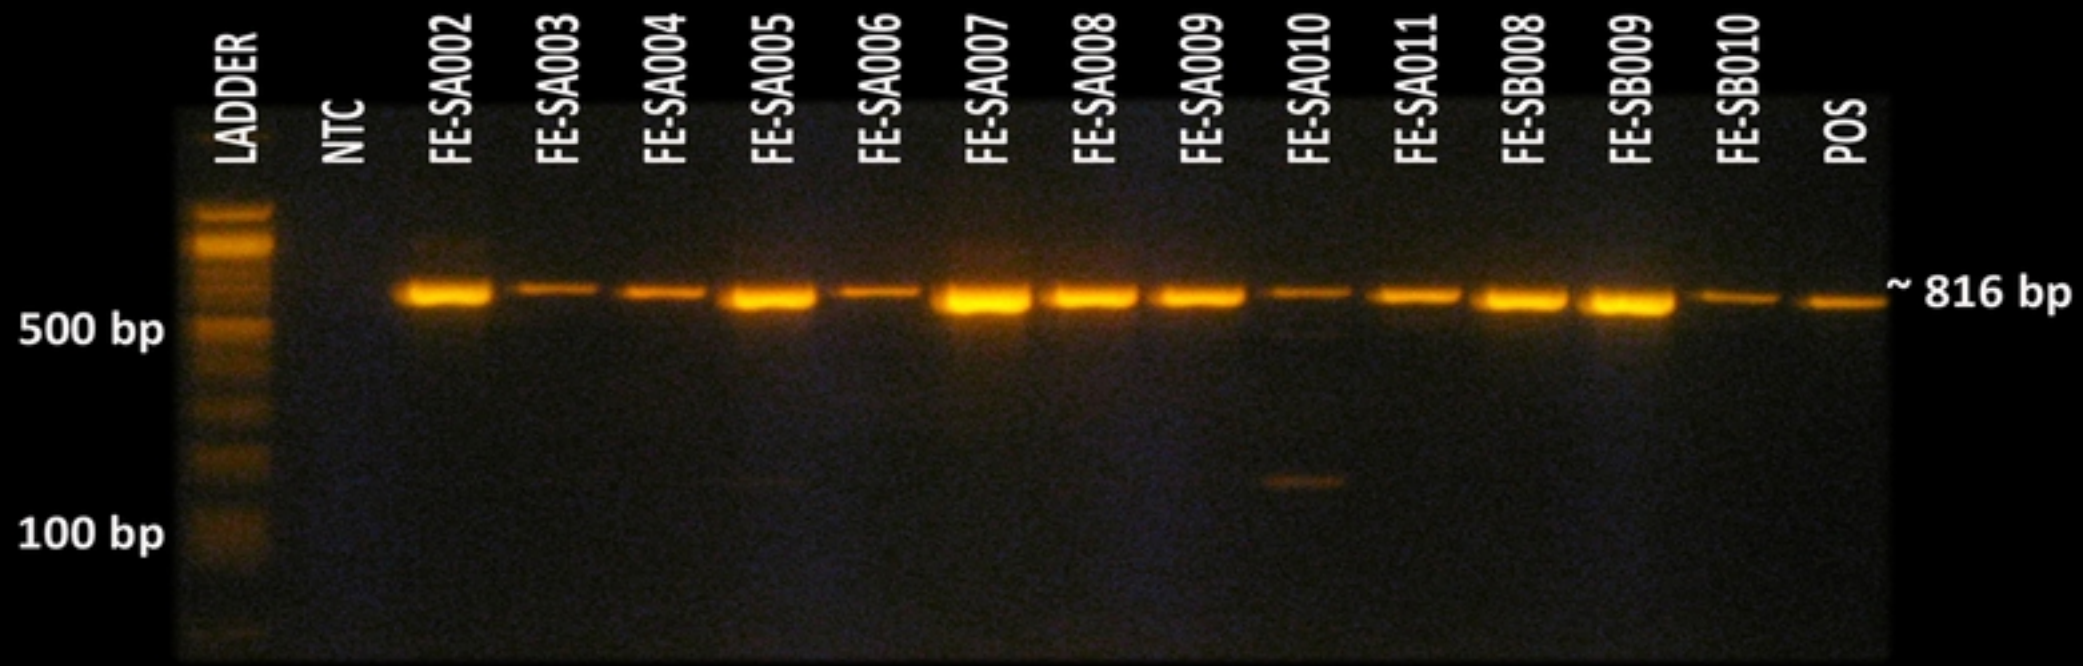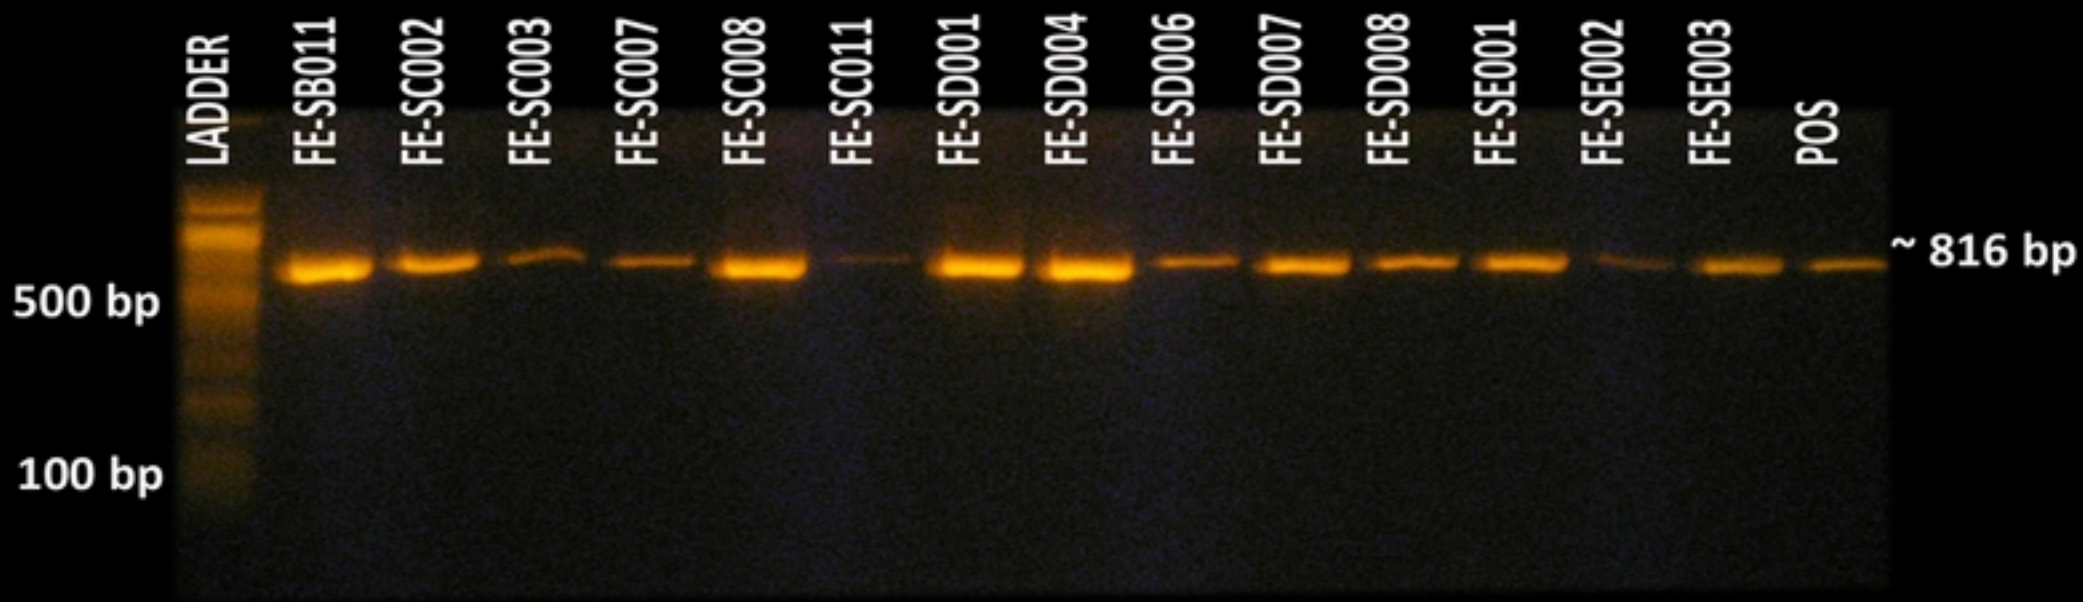

Figure 2

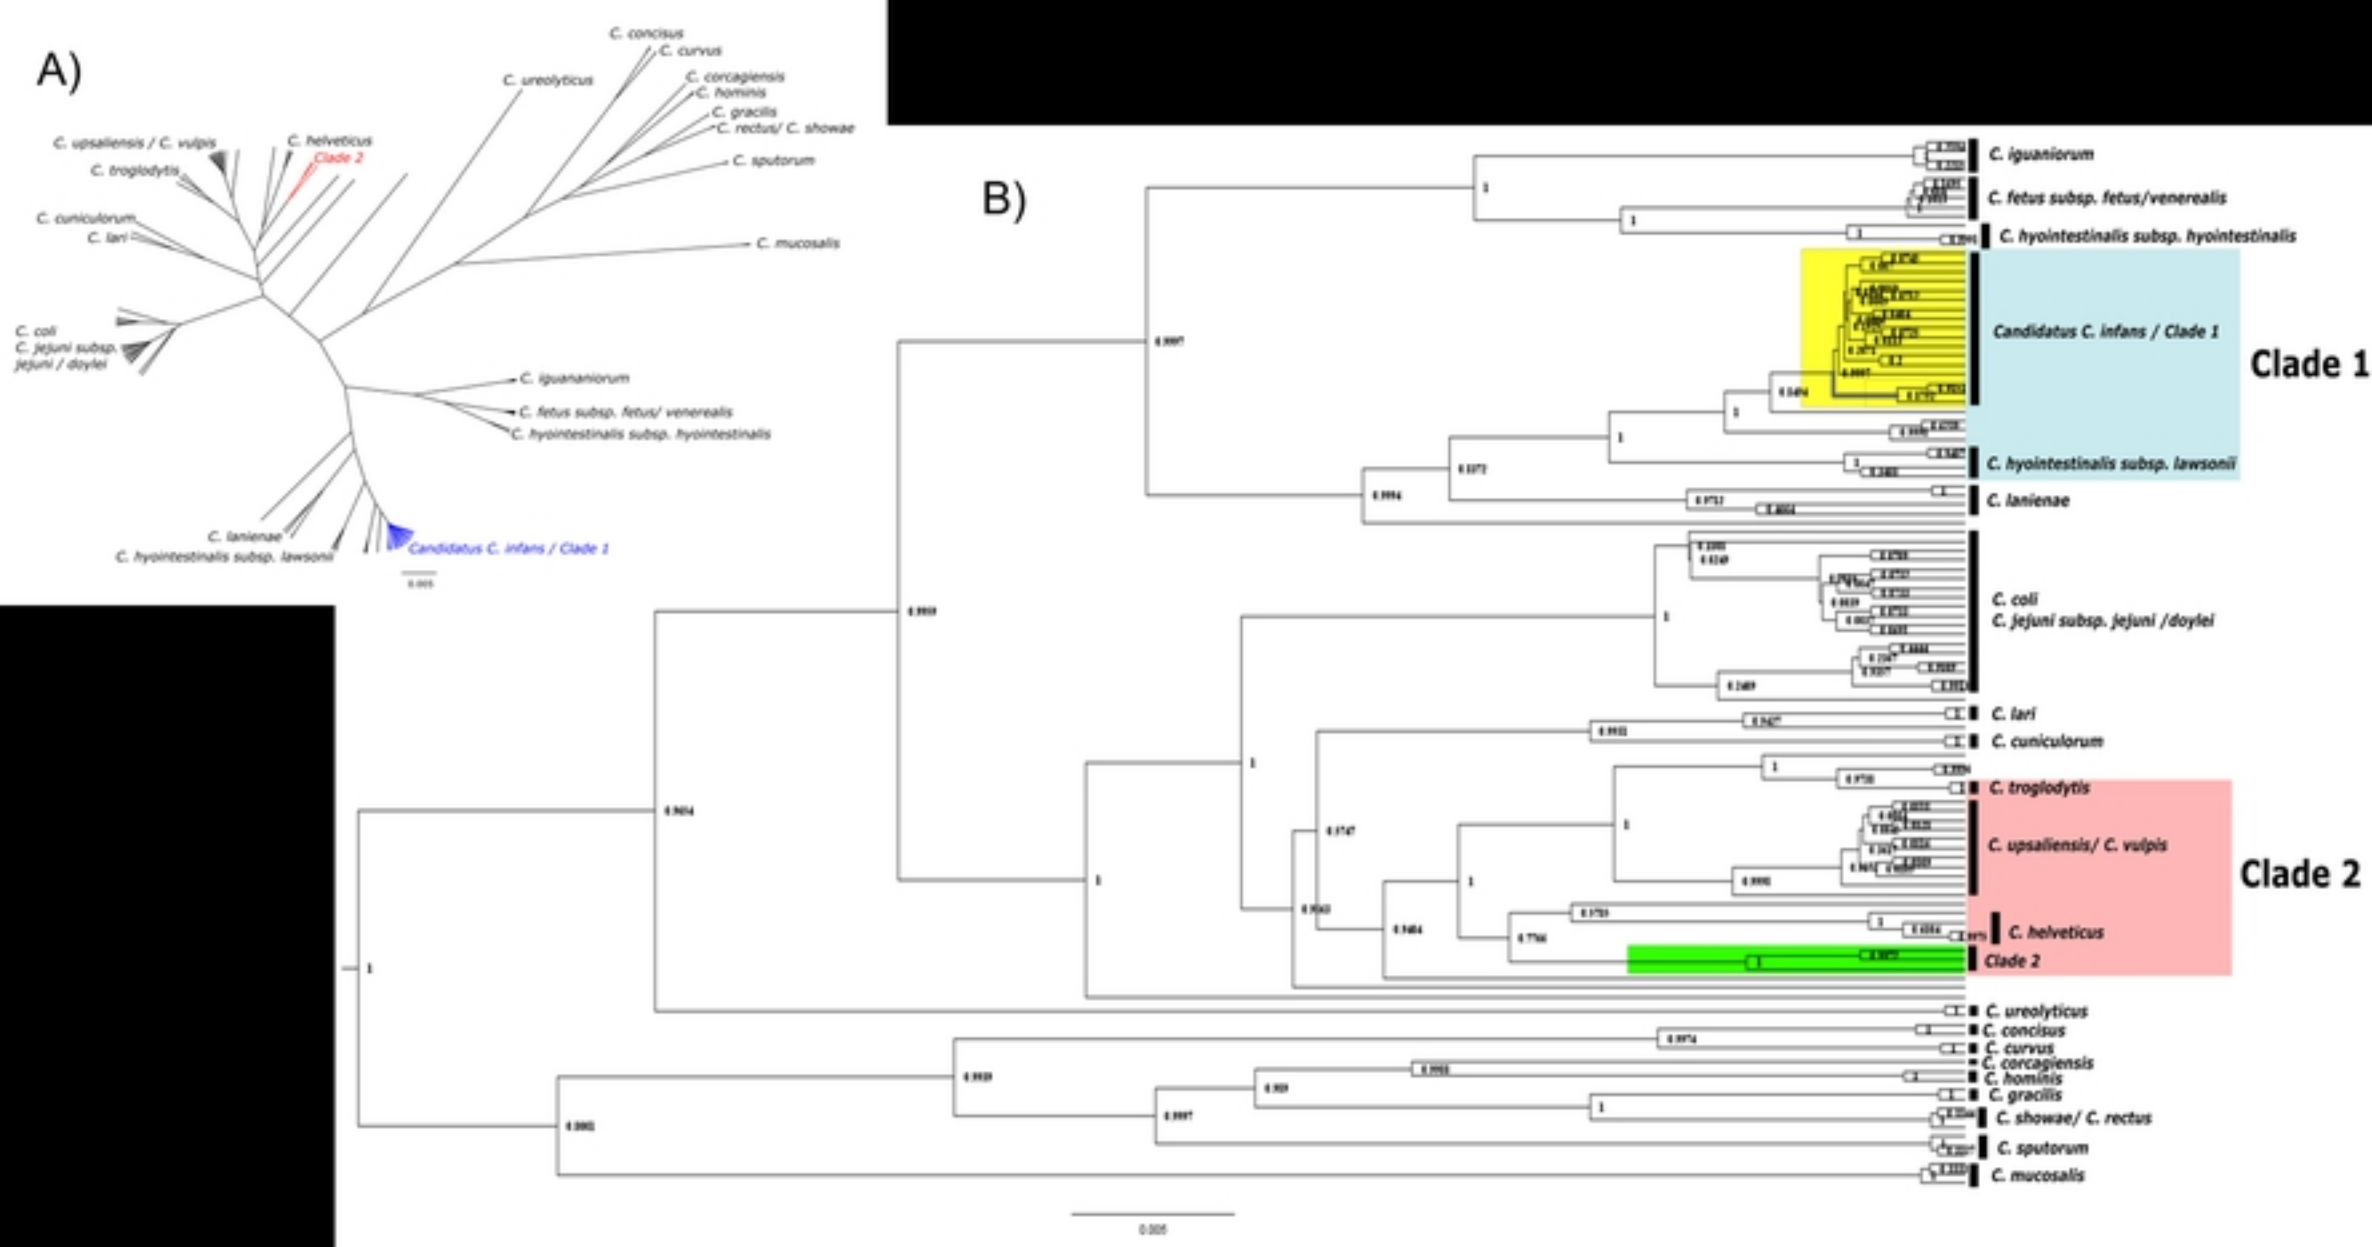

Figure 3
